# Supplementary material
Source: MDPI journal article supplement (https://www.mdpi.com/2071-1050/12/9/3590)
Supplement: s1 [file s1]

# City Check-up Assessment

Please take a few minutes to fill out our survey.

Your feedback is really important as it can improve our Integrated Energy Planning concept and you can find inspiration for creative new ideas including feedback from our SmartEnCity experts.

The form should take no longer than 10 minutes to complete!

Thank you in advance for your collaboration. We really appreciate your time!

SmartEnCity Team

**\*Obligatorio**

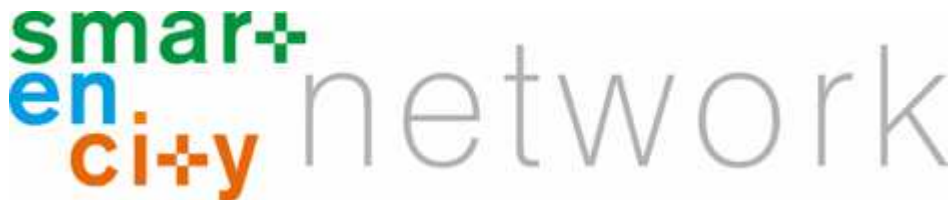

*Salta a la pregunta 1*

Engage

This section delves on governance of energy & decarbonization topic in your municipality

1. Does your city have a coordination group dealing with the energy & decarbonization topic? \*

*Marca solo un óvalo.*

☐ Yes

☐ No

2. Who are the key stakeholders of this group? \*

*Selecciona todos los que correspondan.*

- ☐ Local Authority
- ☐ Politicians
- ☐ Technicians
- ☐ Industry
- ☐ Academia
- ☐ Citizenship
- ☐ NGOs
- ☐ Financial Institutions
- ☐ Not applicable

3. Is this core group constant over time or temporary? \*

*Selecciona todos los que correspondan.*

- ☐ Constant
- ☐ Temporary
- ☐ Not applicable

4. What is this group focussing on? \*

*Selecciona todos los que correspondan.*

- ☐ Built Environment
- ☐ Mobility
- ☐ Energy Supply (Heating and Cooling)
- ☐ Energy Supply (Electricity)
- ☐ Citizen Engagement
- ☐ ICT
- ☐ Waste
- ☐ Not applicable

Otro: ☐ \_\_\_\_\_

5. Please give a general description of how the group is financed \*

*Selecciona todos los que correspondan.*

- ☐ Fully financed by municipality
- ☐ National/ Regional funding
- ☐ EU funding
- ☐ Public-private
- ☐ Not applicable

Otro: ☐ \_\_\_\_\_

Analyse  
and  
Diagnose

This section delves on city analyses, diagnoses, baseline studies, etc.  
performed in your city within the energy & decarbonization topic

6. Have you done a city analysis and diagnosis in connection with the energy & decarbonization topic? \*

*Marca solo un óvalo.*

- ☐ Yes
- ☐ No

7. If yes, when have you done this analysis and diagnosis?

*Marca solo un óvalo.*

- ☐ Before 2010
- ☐ 2010 - 2015
- ☐ 2015 - 2018
- ☐ 2019

8. What kind of data did you use to perform this analysis and diagnosis? \*

*Selecciona todos los que correspondan.*

|                                                                        | Reports                  | Indicators/<br>KPIs      | Georeferenced<br>(GIS)   | Other                    | Not<br>relevant          | Metered<br>data          |
|------------------------------------------------------------------------|--------------------------|--------------------------|--------------------------|--------------------------|--------------------------|--------------------------|
| <b>Socio-economic</b>                                                  | <input type="checkbox"/> |
| <b>Business and financial</b>                                          | <input type="checkbox"/> |
| <b>Urban environment and quality of life</b>                           | <input type="checkbox"/> |
| <b>Sectorial strategies: energy, built environment, mobility, etc.</b> | <input type="checkbox"/> |
| <b>Existing policies, and regulations</b>                              | <input type="checkbox"/> |

9. If you have used other kind of data, please specify

---

10. Which city sectors did you include in the analysis and diagnosis? \*

*Selecciona todos los que correspondan.*

- ☐ Urban Planning
- ☐ Energy
- ☐ Mobility
- ☐ Built Environment
- ☐ Green Infrastructures
- ☐ Citizen Engagement
- ☐ Not relevant

Otro: ☐ \_\_\_\_\_

11. Which methods did you use to perform a city diagnosis? \*

*Selecciona todos los que correspondan.*

- ☐ SWOT
- ☐ Delphi
- ☐ Brainstorm
- ☐ Not Relevant

Otro: ☐ \_\_\_\_\_

Envision

This section delves on the procedures to develop a city vision towards decarbonization

12. Do you have a long-term vision in the energy & decarbonization topic? \*

*Marca solo un óvalo.*

- ☐ Yes
- ☐ We are currently developing one
- ☐ No, but we are considering so
- ☐ No

13. Have you generated potential energy & decarbonization city scenarios? \*

*Marca solo un óvalo.*

- ☐ Yes  
☐ No  
☐ Don't know

14. If the answer was yes, how do you use them further in your process?

\_\_\_\_\_

15. Is the development of a vision a participatory process? \*

*Marca solo un óvalo.*

- ☐ Yes  
☐ No  
☐ Partly  
☐ Not applicable

16. What kind of stakeholders are involved? \*

*Selecciona todos los que correspondan.*

- ☐ Politicians  
☐ Public administration technicians  
☐ Industrial partners  
☐ Experts/ researchers  
☐ NGOs  
☐ Citizens

Otro: ☐ \_\_\_\_\_

17. Do you set working groups on the main topics within your energy & decarbonization scenarios processes? \*

*Marca solo un óvalo.*

- ☐ Yes  
☐ No  
☐ Partly

18. Do you collaborate with other cities regarding energy & decarbonization ambitions? \*

*Marca solo un óvalo.*

- ☐ Yes, on a national level  
☐ Yes, on an international level  
☐ No

19. Do you belong to a cities' network on the topic with knowledge-sharing purposes? \*

*Selecciona todos los que correspondan.*

- ☐ Yes, to a national network  
☐ Yes, to an international network  
☐ No

Plan  
(City  
Level)

This section delves on the decarbonization plan, as a structuring and guiding document towards city decarbonization

20. Does your city have a strategic plan on energy & decarbonization topic? \*

*Marca solo un óvalo.*

- ☐ Yes
- ☐ We are currently developing one
- ☐ No, but we are considering so
- ☐ No

21. Are there allocated resources for the actions identified in that plan? \*

*Marca solo un óvalo.*

- ☐ Yes
- ☐ No
- ☐ Partly

22. Does your plan include tangible targets? (e.g.: m<sup>2</sup>, %, CO<sub>2</sub>, KPIs, deadlines?) \*

*Selecciona todos los que correspondan.*

- ☐ 1 (not tangible at all)
- ☐ 2 (rather not tangible)
- ☐ 3 (more or less tangible)
- ☐ 4 (rather tangible)
- ☐ 5 (tangible)

23. Are your tangible targets connected to your city vision? \*

*Marca solo un óvalo.*

- ☐ Yes
- ☐ No



## Integrate

This last section delves on the integration of the outcomes of the decarbonization plan into Municipal Planning

24. Is there a procedure to integrate the outcomes of your energy & decarbonization plan into Municipal Planning? \*

*Marca solo un óvalo.*

- ☐ Yes  
☐ No  
☐ Somewhat

25. If yes, how do you integrate those outcomes? (land-use, legal viability, municipal competences, acknowledgement by other municipal departments, etc.)

---

---

---

---

---

26. Who is in charge of integrating the energy & decarbonisation plan into the Municipal Planning?

---

27. What are the biggest challenges or barriers for the municipality in developing and/or implementing the energy and decarbonisation plan? (e.g. the lack of quantified objectives, or clear adaptation policy goals and targets at a national or local level; fragmented, limited or non-existent adaptation actions; the lack of a proper assessment of the resources and capacity needed to deliver adaptation at the local level.)

---

---

---

---

---

Inspiration

Where did you get your inspiration....

28. Have you received inspiration for your city energy plans and/or actions from the following sources?

*Selecciona todos los que correspondan.*

- ☐ SmartEnCity.eu <<http://SmartEnCity.eu>> website
- ☐ Smartencitynetwork.eu <<http://smartencitynetwork.eu>> website
- ☐ SmartEnCity project workshops

Otro: ☐ \_\_\_\_\_

Contact information

29. Name \*

---

30. Type of your Organisation you are working for

*Marca solo un óvalo.*

☐ Municipality

☐ Company

☐ University / Research Organisation

☐ Otro: \_\_\_\_\_

31. Name of your Organisation \*

\_\_\_\_\_

32. What is your current job title/position? (\*Please specify if you are working in a municipality and/or local government)

\_\_\_\_\_

33. Email address \*

\_\_\_\_\_

34. Would you like to receive feedback based on your answers from the SmartEnCity project experts? \*

*Marca solo un óvalo.*

☐ Yes

☐ No

---

Este contenido no ha sido creado ni aprobado por Google.

Google Formularios
